# Supplementary material for: Association of LACC1, CEBPB-PTPN1, RIPK2 and ADO-EGR2 with ocular Behcet’s disease in a Chinese Han population
Source: PubMed Central journal article supplement — Br J Ophthalmol. 2018 Jun 15;102(9):1308–14. doi: 10.1136/bjophthalmol-2017-311753 (PMC6104672; doi:10.1136/bjophthalmol-2017-311753), 2018-06-15
Supplement: bjophthalmol-2017-311753supp001.pdf [file bjophthalmol-2017-311753supp001.pdf]

**Supplementary Table1 The frequency of genotypes and alleles of the tested SNPs in the First Stage (478 cases and 662 controls)**

| Nearest gene(s)       | SNP        | Genotype /Allele | Case | freq  | Control | freq  | P value | OR(95%CI)           | Statistical Power |
|-----------------------|------------|------------------|------|-------|---------|-------|---------|---------------------|-------------------|
| <i>IL1A-<br/>IL1B</i> | rs3783550  | GG               | 212  | 0.446 | 293     | 0.446 | 0.991   | 1.001 (0.790-1.270) | 0.867             |
|                       |            | GT               | 218  | 0.459 | 289     | 0.440 | 0.524   | 1.080 (0.852-1.369) |                   |
|                       |            | TT               | 45   | 0.095 | 75      | 0.114 | 0.295   | 0.812 (0.550-1.199) |                   |
| <i>RIPK2</i>          | rs2230801  | G                | 642  | 0.676 | 875     | 0.666 | 0.622   | 1.046 (0.875-1.249) | 0.230             |
|                       |            | CC               | 0    | 0.000 | 1       | 0.002 | 1       | 1.002 (0.999-1.005) |                   |
|                       |            | CT               | 15   | 0.031 | 21      | 0.032 | 0.965   | 0.985 (0.502-1.931) |                   |
|                       |            | TT               | 462  | 0.969 | 636     | 0.967 | 0.852   | 1.065 (0.547-2.076) |                   |
| <i>ADO-<br/>EGR2</i>  | rs1509966  | C                | 15   | 0.016 | 23      | 0.017 | 0.748   | 0.898 (0.466-1.730) | 0.614             |
|                       |            | AA               | 27   | 0.056 | 48      | 0.073 | 0.261   | 0.757 (0.465-1.232) |                   |
|                       |            | AG               | 167  | 0.349 | 254     | 0.388 | 0.186   | 0.848 (0.663-1.083) |                   |
|                       |            | GG               | 284  | 0.594 | 353     | 0.539 | 0.064   | 1.252 (0.987-1.590) |                   |
| <i>ADO-<br/>EGR2</i>  | rs7075773  | A                | 221  | 0.231 | 350     | 0.267 | 0.051   | 0.825 (0.679-1.001) | 0.738             |
|                       |            | CC               | 355  | 0.746 | 457     | 0.696 | 0.064   | 1.284 (0.985-1.673) |                   |
|                       |            | CT               | 111  | 0.233 | 181     | 0.275 | 0.108   | 0.800 (0.609-1.051) |                   |
|                       |            | TT               | 10   | 0.021 | 19      | 0.029 | 0.451   | 0.721 (0.332-1.564) |                   |
| <i>THADA</i>          | rs10176241 | T                | 131  | 0.138 | 219     | 0.167 | 0.059   | 0.798 (0.631-1.009) | 0.738             |
|                       |            | AA               | 201  | 0.421 | 310     | 0.473 | 0.087   | 0.813 (0.641-1.031) |                   |
|                       |            | AG               | 226  | 0.474 | 274     | 0.418 | 0.060   | 1.255 (0.990-1.592) |                   |
|                       |            | GG               | 50   | 0.105 | 72      | 0.110 | 0.791   | 0.950 (0.648-1.391) |                   |

|                          |            |    |     |       |     |       |       |                     |       |
|--------------------------|------------|----|-----|-------|-----|-------|-------|---------------------|-------|
| <i>CPLX1</i>             | rs11248047 | A  | 628 | 0.658 | 894 | 0.681 | 0.247 | 0.901 (0.754-1.075) | 0.652 |
|                          |            | GG | 136 | 0.287 | 188 | 0.287 | 0.984 | 0.997 (0.768-1.295) |       |
|                          |            | GA | 233 | 0.492 | 311 | 0.476 | 0.595 | 1.066 (0.842-1.351) |       |
|                          |            | AA | 105 | 0.222 | 155 | 0.237 | 0.542 | 0.916 (0.691-1.214) |       |
| <i>INHBA</i>             | rs17705333 | A  | 443 | 0.476 | 621 | 0.475 | 0.726 | 0.970 (0.821-1.147) | 0.824 |
|                          |            | AA | 8   | 0.017 | 14  | 0.021 | 0.667 | 0.785 (0.327-1.886) |       |
|                          |            | AG | 120 | 0.252 | 167 | 0.254 | 0.932 | 0.988 (0.753-1.296) |       |
|                          |            | GG | 349 | 0.732 | 477 | 0.725 | 0.801 | 1.035 (0.794-1.349) |       |
| <i>IKZF1</i>             | rs9656588  | A  | 136 | 0.143 | 195 | 0.148 | 0.708 | 0.956 (0.754-1.211) | 0.426 |
|                          |            | CC | 86  | 0.180 | 118 | 0.180 | 0.995 | 1.001 (0.736-1.361) |       |
|                          |            | CT | 248 | 0.520 | 316 | 0.482 | 0.213 | 1.162 (0.917-1.471) |       |
|                          |            | TT | 143 | 0.300 | 221 | 0.337 | 0.181 | 0.841 (0.652-1.084) |       |
| <i>TNFSF8</i>            | rs911603   | T  | 534 | 0.560 | 758 | 0.579 | 0.370 | 0.926 (0.782-1.096) | 0.863 |
|                          |            | CC | 171 | 0.358 | 229 | 0.352 | 0.816 | 1.030 (0.805-1.318) |       |
|                          |            | CA | 229 | 0.480 | 303 | 0.465 | 0.626 | 1.061 (0.837-1.344) |       |
|                          |            | AA | 77  | 0.161 | 119 | 0.183 | 0.349 | 0.861 (0.628-1.179) |       |
| <i>IPMK-<br/>UBE2D1</i>  | rs28734985 | A  | 383 | 0.401 | 541 | 0.416 | 0.503 | 0.944 (0.796-1.118) | 0.673 |
|                          |            | AA | 393 | 0.824 | 556 | 0.842 | 0.407 | 0.875 (0.639-1.199) |       |
|                          |            | AG | 83  | 0.174 | 104 | 0.158 | 0.461 | 1.126 (0.821-1.545) |       |
|                          |            | GG | 1   | 0.002 | 0   | 0.000 | 0.420 | 0.998 (0.994-1.002) |       |
| <i>MAP3K11<br/>-RELA</i> | rs10896027 | G  | 85  | 0.089 | 104 | 0.079 | 0.379 | 0.613 (0.505-0.744) | 0.544 |
|                          |            | GG | 23  | 0.048 | 39  | 0.060 | 0.414 | 1.144 (0.848-1.543) |       |
|                          |            | GC | 153 | 0.322 | 240 | 0.367 | 0.118 | 0.820 (0.639-1.052) |       |

|                |            |    |     |       |     |       |       |                     |       |
|----------------|------------|----|-----|-------|-----|-------|-------|---------------------|-------|
|                |            | CC | 299 | 0.629 | 375 | 0.573 | 0.058 | 1.264 (0.992-1.610) |       |
|                |            | G  | 199 | 0.209 | 318 | 0.243 | 0.060 | 0.825 (0.675-1.009) | 0.536 |
| <i>MAP3K11</i> | rs58950470 | GG | 385 | 0.821 | 514 | 0.786 | 0.148 | 1.248 (0.924-1.687) |       |
| <i>-RELA</i>   |            | GT | 84  | 0.179 | 138 | 0.211 | 0.186 | 0.816 (0.603-1.103) |       |
|                |            | TT | 0   | 0.000 | 2   | 0.003 | 0.231 | 1.003 (0.999-1.007) |       |
|                |            | T  | 84  | 0.090 | 142 | 0.109 | 0.140 | 0.808 (0.608-1.073) | 0.465 |
| <i>ATP10A</i>  | rs4906762  | TT | 23  | 0.048 | 49  | 0.075 | 0.068 | 0.624 (0.375-1.039) |       |
|                |            | TC | 188 | 0.392 | 230 | 0.351 | 0.154 | 1.194 (0.936-1.523) |       |
|                |            | CC | 268 | 0.559 | 376 | 0.574 | 0.625 | 0.942 (0.743-1.195) |       |
|                |            | T  | 234 | 0.244 | 328 | 0.250 | 0.739 | 0.968 (0.798-1.174) | 0.640 |
| <i>SOCS1-</i>  | rs3844576  | CC | 42  | 0.088 | 53  | 0.081 | 0.666 | 1.098 (0.719-1.676) |       |
| <i>TNP2</i>    |            | CA | 185 | 0.387 | 262 | 0.399 | 0.689 | 0.952 (0.748-1.212) |       |
|                |            | AA | 251 | 0.525 | 342 | 0.521 | 0.879 | 1.018 (0.804-1.289) |       |
|                |            | A  | 687 | 0.719 | 946 | 0.720 | 0.945 | 0.993 (0.825-1.196) | 0.714 |
| <i>CKM-</i>    | rs1793978  | CC | 77  | 0.162 | 99  | 0.151 | 0.619 | 1.086 (0.785-1.502) |       |
| <i>KLC3</i>    |            | CT | 216 | 0.454 | 331 | 0.505 | 0.091 | 0.816 (0.644-1.033) |       |
|                |            | TT | 183 | 0.384 | 226 | 0.345 | 0.167 | 1.188 (0.930-1.518) |       |
|                |            | T  | 582 | 0.611 | 783 | 0.597 | 0.485 | 1.063 (0.896-1.261) | 0.635 |
| <i>IL12A</i>   | rs2647935  | CC | 392 | 0.834 | 542 | 0.826 | 0.731 | 1.057 (0.771-1.450) |       |
|                |            | CT | 76  | 0.162 | 114 | 0.174 | 0.594 | 0.917 (0.667-1.260) |       |
|                |            | TT | 2   | 0.004 | 0   | 0.000 | 0.174 | 0.996 (0.990-1.002) |       |
|                |            | T  | 80  | 0.085 | 114 | 0.087 | 0.882 | 0.978 (0.725-1.318) | 0.262 |
| <i>FUT2</i>    | rs1047781  | AA | 148 | 0.313 | 215 | 0.325 | 0.660 | 0.945 (0.733-1.217) |       |

|             |          |     |     |       |     |       |        |                     |       |
|-------------|----------|-----|-----|-------|-----|-------|--------|---------------------|-------|
|             |          | A/T | 210 | 0.444 | 318 | 0.481 | 0.217  | 0.861 (0.680-1.092) |       |
|             |          | TT  | 115 | 0.243 | 128 | 0.194 | 0.045* | 1.338 (1.006-1.779) |       |
|             |          | T   | 440 | 0.465 | 574 | 0.434 | 0.144  | 1.133 (0.958-1.340) | 1     |
| <i>FUT2</i> | rs601338 | AA  | 0   | 0.000 | 1   | 0.002 | 1      | 1.002 (0.999-1.005) |       |
|             |          | AG  | 10  | 0.021 | 11  | 0.017 | 0.658  | 1.261 (0.531-2.995) |       |
|             |          | GG  | 467 | 0.979 | 647 | 0.982 | 0.828  | 0.866 (0.371-2.022) |       |
|             |          | A   | 10  | 0.010 | 13  | 0.010 | 1      | 1.063 (0.464-2.435) | 0.204 |

SNP, single-nucleotide polymorphism; BD, Behcet's disease; OR, odds ratio; 95 % CI, 95 % confidence interval; \* :  $P < 0.05$ ,  $P > 0.05$ ;

Statistical power was estimated from effect size in the original Turkish data sets, allele frequency and sample size in the Chinese Han populatio

**Supplementary Table 2 Main effects of SNPs identified in this study on clinical feature risk of BD**

| SNP      | Clinical features | Genotype/<br>Allele | BD<br>with | freq  | BD<br>without | Freq  | P value             | OR(95%CI)           | Statistical<br>Power |
|----------|-------------------|---------------------|------------|-------|---------------|-------|---------------------|---------------------|----------------------|
| rs913678 | Genital<br>ulcer  |                     | n=685      |       | n=551         |       |                     |                     |                      |
|          |                   | CC                  | 371        | 0.542 | 285           | 0.517 | 0.394               | 1.103 (0.881-1.381) |                      |
|          |                   | CT                  | 262        | 0.382 | 221           | 0.401 | 0.505               | 0.925 (0.735-1.164) |                      |
|          |                   | TT                  | 52         | 0.076 | 45            | 0.082 | 0.708               | 0.924 (0.609-1.400) |                      |
|          |                   | C                   | 1004       | 0.733 | 791           | 0.718 | 0.404               | 1.079 (0.903-1.288) | 0.134                |
|          | Arthritis         |                     | n=223      |       | n=1013        |       |                     |                     |                      |
|          |                   | CC                  | 105        | 0.471 | 551           | 0.544 | 0.048*              | 0.746 (0.558-0.998) |                      |
|          |                   | CT                  | 97         | 0.435 | 386           | 0.381 | 0.135               | 1.250 (0.932-1.677) |                      |
|          |                   | TT                  | 21         | 0.094 | 76            | 0.075 | 0.336               | 0.282 (0.772-2.127) |                      |
|          |                   | C                   | 307        | 0.688 | 1488          | 0.734 | 0.048*              | 0.799 (0.639-0.998) | 0.505                |
|          | Skin<br>lesions   |                     | n=926      |       | n=310         |       |                     |                     |                      |
|          |                   | CC                  | 488        | 0.527 | 168           | 0.542 | 0.648               | 0.942 (0.728-1.219) |                      |
|          |                   | CT                  | 366        | 0.395 | 117           | 0.377 | 0.578               | 1.078 (0.827-1.405) |                      |
| TT       |                   | 72                  | 0.078      | 25    | 0.081         | 0.870 | 0.961 (0.598-1.544) |                     |                      |
|          | C                 | 1342                | 0.725      | 453   | 0.731         | 0.771 | 0.970 (0.791-1.190) | 0.059               |                      |

|           |                         |       |       |        |       |                     |                     |       |  |
|-----------|-------------------------|-------|-------|--------|-------|---------------------|---------------------|-------|--|
| rs9316059 | Positive pathology test | n=47  |       | n=1189 |       |                     |                     |       |  |
|           | CC                      | 21    | 0.447 | 635    | 0.534 | 0.240               | 0.705 (0.392-1.266) |       |  |
|           | CT                      | 23    | 0.489 | 460    | 0.387 | 0.158               | 1.519 (0.847-2.723) |       |  |
|           | TT                      | 3     | 0.064 | 94     | 0.079 | 0.703               | 0.794 (0.242-2.606) |       |  |
|           | C                       | 65    | 0.691 | 1730   | 0.728 | 0.443               | 0.840 (0.537-1.313) | 0.128 |  |
|           | Genital ulcer           | n=685 |       | n=551  |       |                     |                     |       |  |
|           | TT                      | 32    | 0.047 | 31     | 0.056 | 0.448               | 0.822 (0.495-1.365) |       |  |
|           | TA                      | 227   | 0.331 | 203    | 0.368 | 0.174               | 0.850 (0.672-1.075) |       |  |
|           | AA                      | 426   | 0.622 | 317    | 0.575 | 0.096               | 1.214 (0.966-1.526) |       |  |
|           | T                       | 291   | 0.212 | 265    | 0.240 | 0.097               | 0.852 (0.705-1.029) | 0.382 |  |
|           | Arthritis               | n=223 |       | n=1013 |       |                     |                     |       |  |
|           | TT                      | 14    | 0.063 | 49     | 0.048 | 0.376               | 1.318 (0.714-2.431) |       |  |
|           | TA                      | 64    | 0.287 | 366    | 0.361 | 0.035*              | 0.712 (0.518-0.977) |       |  |
|           | AA                      | 145   | 0.650 | 598    | 0.590 | 0.098               | 1.290 (0.953-1.746) |       |  |
|           | T                       | 92    | 0.206 | 464    | 0.229 | 0.298               | 0.875 (0.680-1.125) | 0.174 |  |
|           | Skin lesions            | n=931 |       | n=305  |       |                     |                     |       |  |
| TT        | 45                      | 0.048 | 18    | 0.059  | 0.462 | 0.810 (0.461-1.421) |                     |       |  |
| TA        | 326                     | 0.350 | 104   | 0.341  | 0.770 | 1.041 (0.793-1.367) |                     |       |  |

|                 |                              |       |       |       |        |       |                     |                     |       |
|-----------------|------------------------------|-------|-------|-------|--------|-------|---------------------|---------------------|-------|
| rs10094579      | Positive<br>pathergy<br>test | AA    | 560   | 0.602 | 183    | 0.600 | 0.963               | 1.006 (0.773-1.310) | 0.062 |
|                 |                              | T     | 416   | 0.223 | 140    | 0.230 | 0.754               | 0.966 (0.777-1.201) |       |
|                 |                              |       | n=47  |       | n=1189 |       |                     |                     |       |
|                 |                              | TT    | 1     | 0.021 | 62     | 0.052 | 0.510               | 0.395 (0.054-2.913) |       |
|                 | Genital<br>ulcer             | TA    | 16    | 0.340 | 414    | 0.348 | 0.913               | 0.966 (0.522-1.787) | 0.110 |
|                 |                              | AA    | 30    | 0.638 | 713    | 0.600 | 0.596               | 1.178 (0.643-2.160) |       |
|                 |                              | T     | 18    | 0.191 | 538    | 0.226 | 0.429               | 0.810 (0.480-1.366) |       |
|                 |                              |       | n=677 |       | n=548  |       |                     |                     |       |
|                 |                              | AA    | 47    | 0.069 | 40     | 0.073 | 0.809               | 0.947 (0.612-1.467) |       |
|                 |                              | CA    | 285   | 0.421 | 214    | 0.391 | 0.281               | 1.135 (0.902-1.428) |       |
|                 |                              | CC    | 5     | 0.510 | 294    | 0.536 | 0.349               | 0.898 (0.716-1.125) |       |
|                 |                              | A     | 906   | 0.280 | 294    | 0.268 | 0.520               | 1.060 (0.887-1.268) |       |
|                 | Arthritis                    |       | n=221 |       | n=1004 |       |                     |                     | 0.097 |
|                 |                              | AA    | 22    | 0.100 | 65     | 0.065 | 0.068               | 1.597 (0.962-2.652) |       |
|                 |                              | CA    | 75    | 0.339 | 424    | 0.422 | 0.023*              | 0.703 (0.518-0.954) |       |
|                 |                              | CC    | 124   | 0.561 | 515    | 0.513 | 0.195               | 1.214 (0.905-1.627) |       |
| A               |                              | 119   | 0.269 | 554   | 0.276  | 0.776 | 0.967 (0.767-1.219) |                     |       |
| Skin<br>lesions |                              | n=925 |       | n=300 |        |       |                     | 0.058               |       |

|          |                              |    |       |       |        |       |       |                     |                     |
|----------|------------------------------|----|-------|-------|--------|-------|-------|---------------------|---------------------|
| rs224127 | Positive<br>pathergy<br>test | AA | 68    | 0.074 | 19     | 0.063 | 0.551 | 1.173 (0.693-1.986) | 0.053               |
|          |                              | CA | 374   | 0.404 | 125    | 0.417 | 0.705 | 0.950 (0.729-1.238) |                     |
|          |                              | CC | 483   | 0.522 | 156    | 0.520 | 0.948 | 1.009 (0.777-1.309) |                     |
|          |                              | A  | 510   | 0.276 | 163    | 0.272 | 0.848 | 1.020 (0.830-1.255) |                     |
|          |                              |    | n=46  |       | n=1179 |       |       |                     |                     |
|          | Genital<br>ulcer             | AA | 2     | 0.043 | 85     | 0.072 | 0.767 | 0.585 (0.139-2.455) | 0.077               |
|          |                              | CA | 19    | 0.413 | 480    | 0.407 | 0.936 | 1.025 (0.563-1.864) |                     |
|          |                              | CC | 25    | 0.543 | 614    | 0.521 | 0.762 | 1.095 (0.606-1.979) |                     |
|          |                              | A  | 23    | 0.250 | 650    | 0.276 | 0.589 | 0.876 (0.542-1.416) |                     |
|          |                              |    | n=686 |       | n=552  |       |       |                     |                     |
|          | Arthritis                    | GG | 90    | 0.131 | 67     | 0.121 | 0.606 | 1.093 (0.779-1.533) | 0.063               |
|          |                              | GA | 321   | 0.468 | 262    | 0.475 | 0.814 | 0.973 (0.778-1.218) |                     |
|          |                              | AA | 275   | 0.401 | 223    | 0.404 | 0.912 | 0.987 (0.785-1.241) |                     |
|          |                              | A  | 871   | 0.635 | 708    | 0.641 | 0.739 | 0.972 (0.825-1.147) |                     |
|          |                              |    | n=223 |       | n=1015 |       |       |                     |                     |
|          |                              |    | GG    | 29    | 0.130  | 128   | 0.126 | 0.873               | 1.036 (0.673-1.596) |
|          |                              | GA | 93    | 0.417 | 490    | 0.483 | 0.075 | 0.766 (0.572-1.028) |                     |
|          |                              | AA | 101   | 0.453 | 397    | 0.391 | 0.088 | 1.289 (0.962-1.726) |                     |
|          |                              | A  | 295   | 0.661 | 1284   | 0.633 | 0.250 | 1.135 (0.915-1.409) |                     |

| Skin lesions            |    | n=931 |       | n=307  |       |       |                     |       |
|-------------------------|----|-------|-------|--------|-------|-------|---------------------|-------|
|                         | GG | 114   | 0.122 | 43     | 0.140 | 0.421 | 0.857 (0.587-1.249) |       |
|                         | GA | 437   | 0.469 | 146    | 0.476 | 0.851 | 0.976 (0.753-1.263) |       |
|                         | AA | 380   | 0.408 | 118    | 0.384 | 0.461 | 1.105 (0.848-1.439) |       |
|                         | A  | 1197  | 0.643 | 382    | 0.622 | 0.355 | 1.093 (0.905-1.320) | 0.153 |
| Positive pathology test |    | n=47  |       | n=1191 |       |       |                     |       |
|                         | GG | 5     | 0.106 | 152    | 0.128 | 0.825 | 0.814 (0.317-2.089) |       |
|                         | GA | 28    | 0.596 | 555    | 0.466 | 0.080 | 1.689 (0.933-3.057) |       |
|                         | AA | 14    | 0.298 | 484    | 0.406 | 0.137 | 0.620 (0.328-1.170) |       |
|                         | A  | 56    | 0.596 | 1523   | 0.639 | 0.388 | 0.831 (0.546-1.265) | 0.144 |

OR, odds ratio; NS, not significant; 95 % CI, 95 % confidence interval; \*: P< 0.05, P<0.05; Statistical power was estimated from effect size, allele frequency and sample size in this study.
